# Supplementary material for: Arabidopsis leucine-rich repeat receptor–like kinase NILR1 is required for induction of innate immunity to parasitic nematodes
Source: PubMed Central journal article supplement (PMC5391088; doi:10.1371/journal.ppat.1006284), 2017-04-13
Supplement: ppat.1006284.s001.pdf [file ppat.1006284.s001.pdf]

# Arabidopsis leucine-rich repeat receptor–like kinase NILR1 is required for induction of innate immunity to parasitic nematodes

Badou Mendy 1\*, Mary Wanjiku Wang'ombe 1\*, Zoran S. Radakovic 1, Julia Holbein 1, Muhammad Ilyas 1, Divykriti Chopra 1, Nick Holton 2, Cyril Zipfel 2, Florian M. W. Grundle 1†, Shahid Siddique 1†

<sup>1</sup>Rheinische Friedrich-Wilhelms-University of Bonn, INRES – Molecular Phytomedicine, Karlrobert-Kreiten-Straße 13, D-53115 Bonn, Germany

<sup>2</sup>The Sainsbury Laboratory, Norwich Research Park, Norwich, NR4 7UH, UK

\* Equal contributions

† Corresponding authors: Dr. Shahid Siddique: siddique@uni-bonn.de and Prof. Florian M. W. Grundle: grundler@uni-bonn.de

## S1 Text

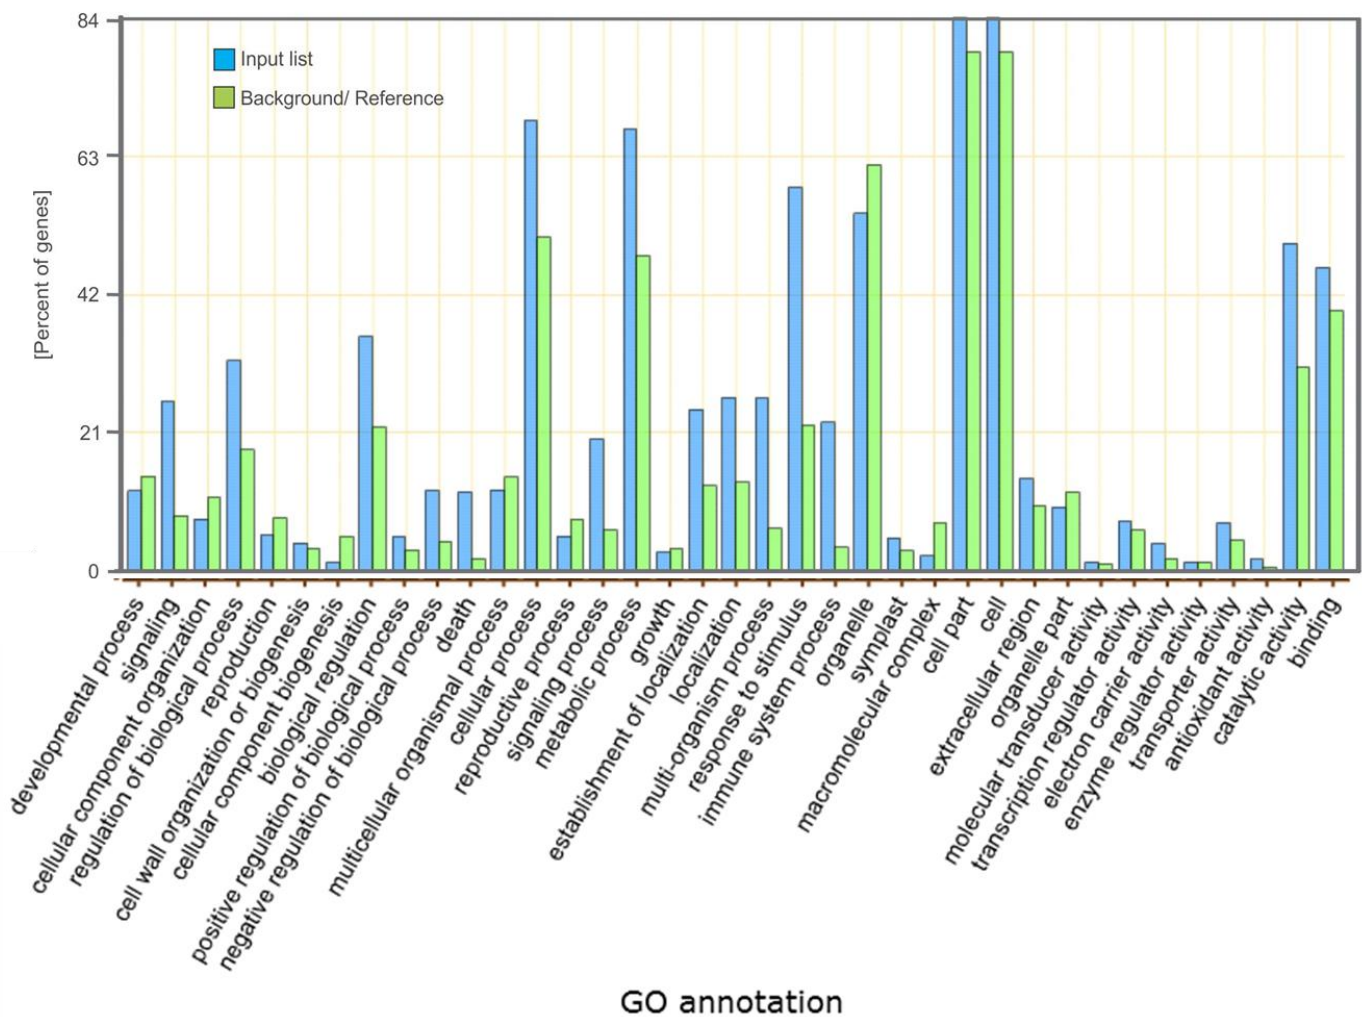

Fig A: GO categories preferentially upregulated during migratory stages of nematode infection.

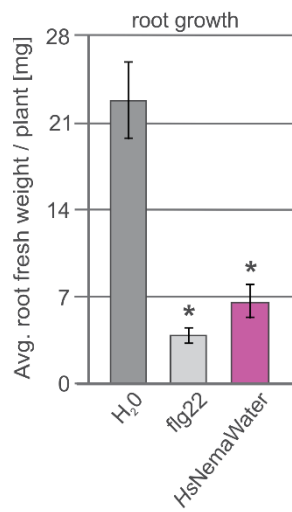

Fig B: Inhibition of root growth upon NemaWater treatment. 5-day-old Col-0 seedlings were incubated in water, flg22, or HsNemaWater for seven days. Fresh weight of root was measured at 12 days after germination. Data were analyzed using *t*-test. Asterisk represent significant difference to water-treated control root segments ( $P < 0.05$ ). Hs, *Heterodera schachtii*.

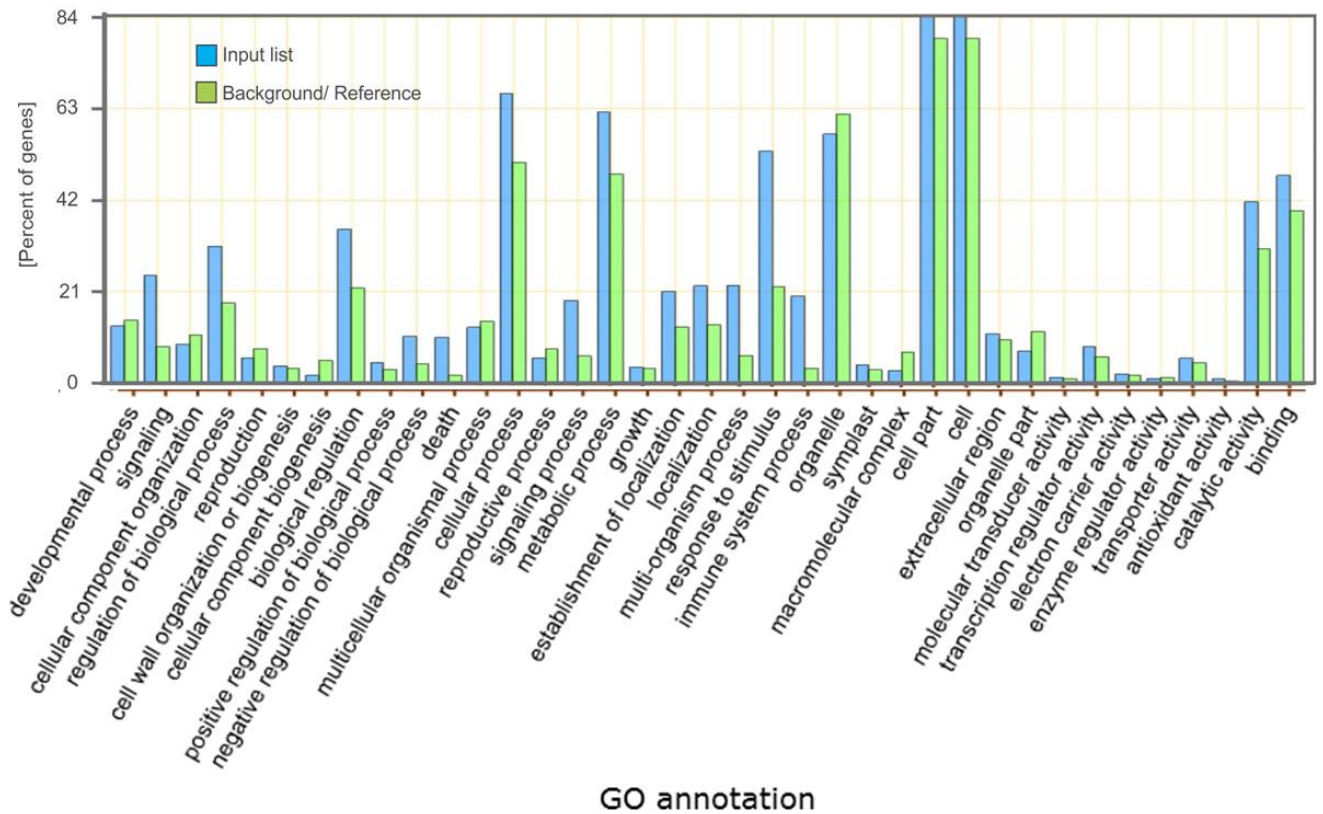

Fig C: GO categories preferentially upregulated upon NemaWater treatment.

Counting of cyst nematode (*H. schachtii*)

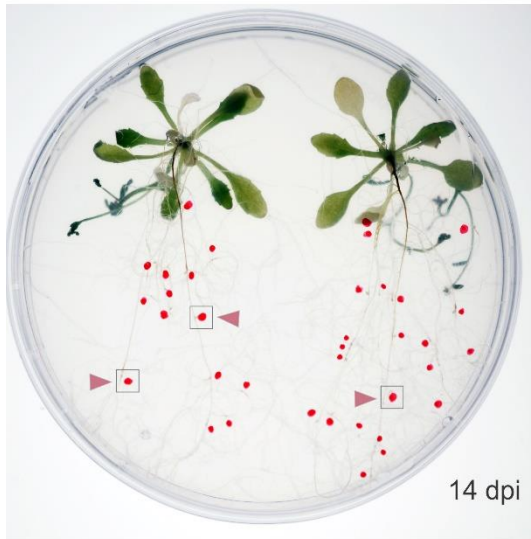

\*female nematode is marked as red dots

Fig D: An illustration of our method for cyst nematode counting. Each Petri dish is screened at 14 dpi under the binocular microscope and each female nematode is marked (represented by dots) to calculate rate of infection per plant.

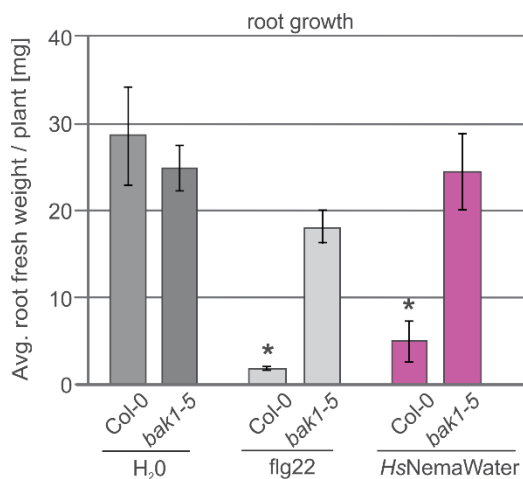

Fig E: Growth inhibition was impaired in *bak1-5* upon NemaWater treatment. 5-day-old Col-0 and *bak1-5* seedlings were incubated in water, flg22, or HsNemaWater for seven days. Fresh weight of the root was measured at 12 days after germination. Data were analyzed using single-factor ANOVA and Dunnet's post hoc test ( $P < 0.05$ ).

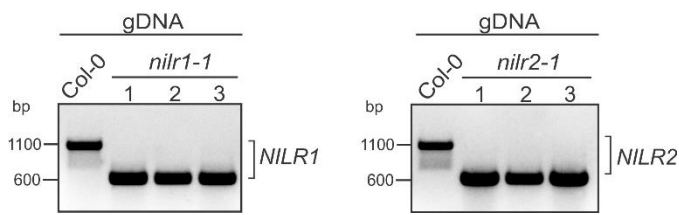

Fig F: Genotyping of NILR1 and NILR2 mutants. Genomic DNA of Col-0 or knockout lines (*nilr1-1*, *nilr2-1*) was PCR amplified using primers given in Dataset 6. The presence or absence of intact wild-type allele is shown.

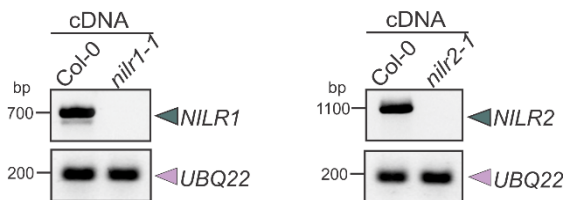

Fig G: RT-PCR for presence or absence of gene expression in Col-0 or knockout mutants. RNA from Col-0 or knockout lines (*nilr1-1*, *nilr2-1*) was extracted to synthesize single stranded cDNA. The presence or absence of expression is shown using primers given in Dataset 6. The upper and lower panel run separately.

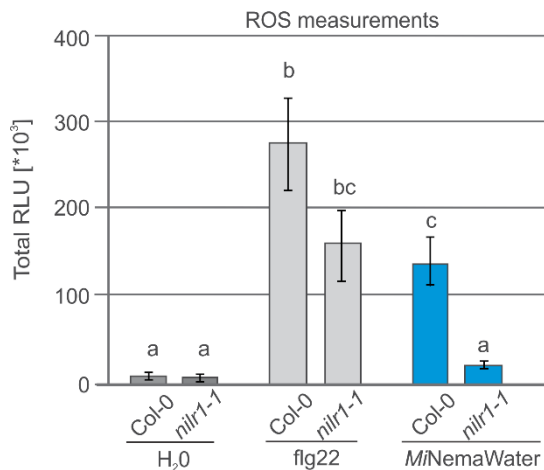

Fig H: Knocking of *NILR1* impair ROS burst to *MiNemaWater*. Root segments from Col-0, and *nilr1-1* plants were treated with water, flg22 or NemaWater from *M. incognita* (*MiNemaWater*) and ROS burst was measured using L-012 based assay from 0 to 120 min. Bars represent mean  $\pm$  SE for twelve biological replicates. Columns sharing same letter are not statistically different.

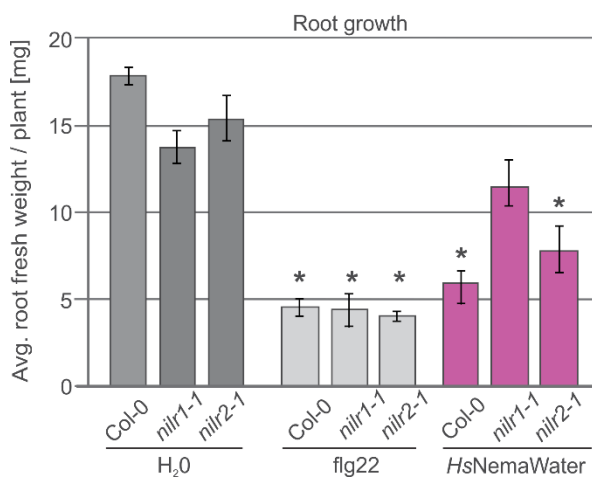

Fig I: NemaWater-induced growth inhibition was reduced strongly in *nilr1-1*. 5-day-old Col-0, *nilr1-1* and *nilr2-1* seedlings were incubated in water, flg22, or NemaWater for seven days. Fresh weight of the root was measured at 12 days after germination. Data were analyzed using single-factor ANOVA and Dunnet's post hoc test ( $P < 0.05$ ).

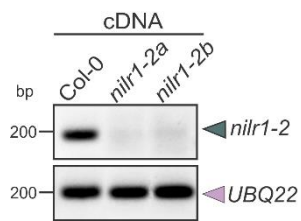

Fig J: Expression analysis of *nilr1-2* mutants. RT-PCR for presence or absence of gene expression in Col-0 or knockout mutants. RNA from Col-0 or knockout line (*nilr1-2*) was extracted to synthesize single stranded cDNA. a and b represent two independent plants. The presence or absence of expression is shown using primers given in Dataset 6.

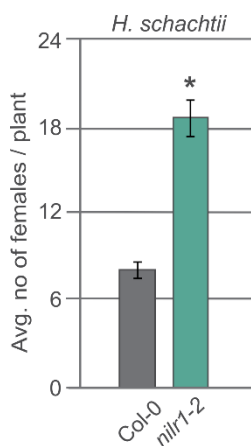

Fig K: Knock-out *nilr1-2* enhances susceptibility to nematodes. Average number of female nematodes per plant in Col-0 and *nilr1-2*. Bars represent mean  $\pm$  SE for six biological replicates.

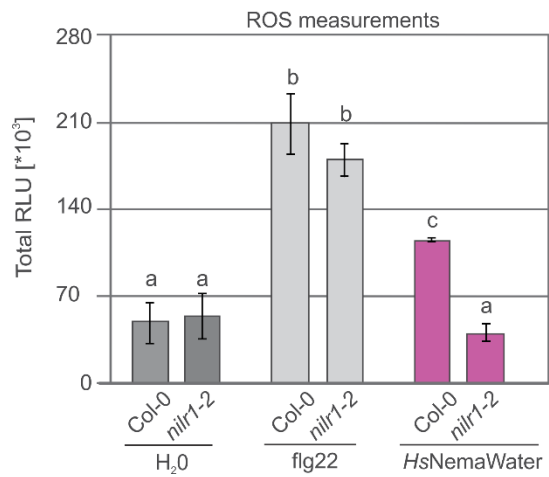

Fig L: Knock-out *nilr1-2* enhances susceptibility to nematodes. Root segments from Col-0, and *nilr1-2* plants were treated with water, flg22 or NemaWater from *H. schachtii* (HsNemaWater) and ROS burst was measured using L-012 based assay from 0 to 120 min. Bars represent mean  $\pm$  SE for three technical replicates. Experiment was repeated three times with similar results.



**Signal peptide 1**

TMVTRVIMTDDDSQSLCFLCFLFFFITAI AVAG

**N-Terminus****35**

DSLDS DREVLLSLKSYLES RNPQNRGLYTEWK MENQDVVCQWP  
GIICTPQRSR

**LRR domain 1-17****88**

VTGINLTDSTISGPLFKNFSALTE  
 LTYLDLSRNTIEGEIPDDL SRCHN  
 LKHLNLSHNI LEGELSLPGLSN  
 LEVLDLSLNRITGDIQSSFP LFCNS  
 LVVANLSTNNFTGRIDDI FNGCRN  
 LKYVDFSSNRFSGEVWTGFGR  
 LVEFSVADNHLSGNISASMF RGNCT  
 LQMLDLSGNAFGGEFPGQVSN CQN  
 LNVLNLWGNKFTGNIPAEIGS ISS  
 LKGLYLGNNTF SRDIPETLLNLTN  
 LVFLDLSRNKFGGDIQEIFGR FTQ  
 VKYLVLHANSYVGGINS SNILKLPN  
 LSRLDLGYNNFSGQLPTEISQ IQS  
 LKFLILAYNNFSGDIPQEYGNMPG  
 LQALDLSFNKLTGSIPASFGK LTS  
 LLWLMLANNSLSGEIPREIGNCTS  
 LLWFNVANNQLSGRFHPELTRMG

**Island domain I****493**

SNPSPTFEVNRQNKDKI IAGSGECLAMKRWIPAEFP PFNFVYAILTKKSCRS  
LWDHVLKGYGLFPVCSAGSTVRTLKI

**LRR domain (18-22)**

SAYLQLSGNKFSGEIPASISQMDR  
 LSTLHLGFNEFEGKLPPEIGQLP  
 LAFLNLTRNNFSGEIPQEIGNLKC  
 LQNLDSL FNNFSGNFPTSLNDLNE  
 LSKFNISYNPFI SGAIPPTTGQVAT

LXXL[DN]LSXNX[FIL][STE]GX[FIL]PX[SE][FIL][SG]RQNX

**690**

FDKDSFLGNPLLRFPSPFNQSGNNTRKISNQVLGNRPRT

**Transmembrane domain****729**

LLLIWISLALALAFIACL VVSGIVLM

**Ser/Thr kinase****755**

VVKASREAEIDLLDGSKTRHDMTSSSGSSPWLSGKIKVIRLDKSTFTYADILK  
 ATSNFSEERVVGRGGYGTVYRGVLPDGREVAVKKLQREGTEAEKEFRAEMEVLS  
 ANAFGDWAHPNLVRLYGWCLDGSEKILVHEYMGGGSLEELITDKTKLQWKKRID  
 IATDVARGLVFLHHECYPSIVHRDVKASNVLLDKHG NARVTD FGLARLLNVGDS  
 HVSTVIAGTIGYVAPEYQQTWQATTRGDVYSYGVLT MELATGRRAVDGGEECLV  
 EWARRVMTGNMTAKGSPITLSGTPGN GAEQMTELLKIGVKCTADHPQARP NMK  
 EVLAMLVKISGKAE LFNGLSSQGYIEM

Fig M: NILR1 encodes a LRR receptor kinase. Primary structure of the NILR1 divided into signal peptide; N-terminal containing a pair of cysteine residues (underlined); the LRR domain with LRR consensus residues in grey; the island domain containing a cysteine cluster with the pattern of Cx2Cx16C; the transmembrane domain; and the Ser/Thr kinase domain.

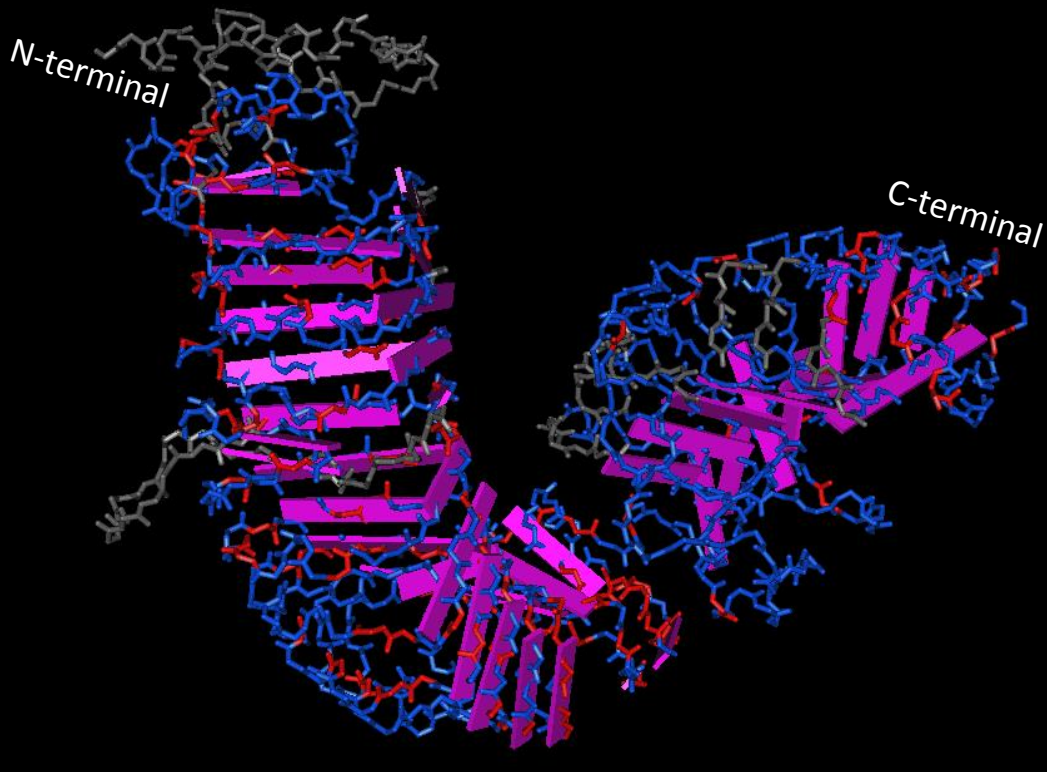

Fig N: A putative structural model for ECD of NILR1. The model was built using BRI1 as template. Conserved and similar residues between BRI1 and NILR1 are highlighted as red or blue respectively. Grey color represents additional residues. White dashed box represent Island domain.

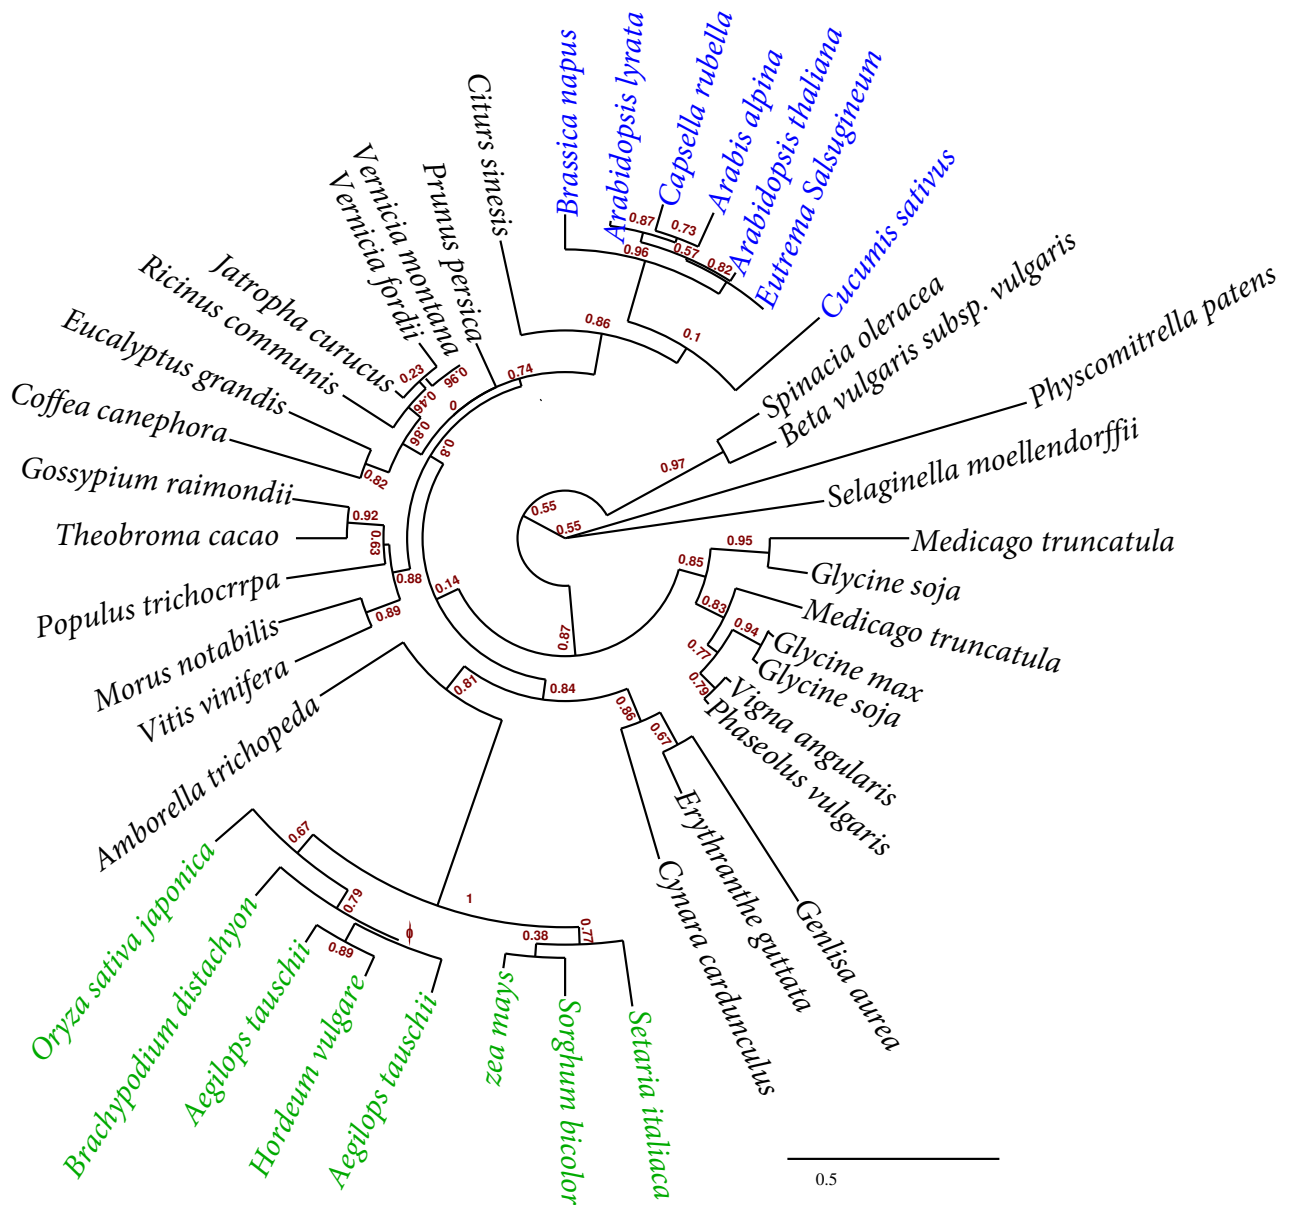

Fig O: Conservation of NILR1 in land plants. A phylogram tree generated from maximum-likelihood trees construction method based on alignment of sequence spanning NILR1's ECD. The number next to each branch (in brown) indicate a measure of support. The number varies between 0 and 1 where 1 represent maximum.

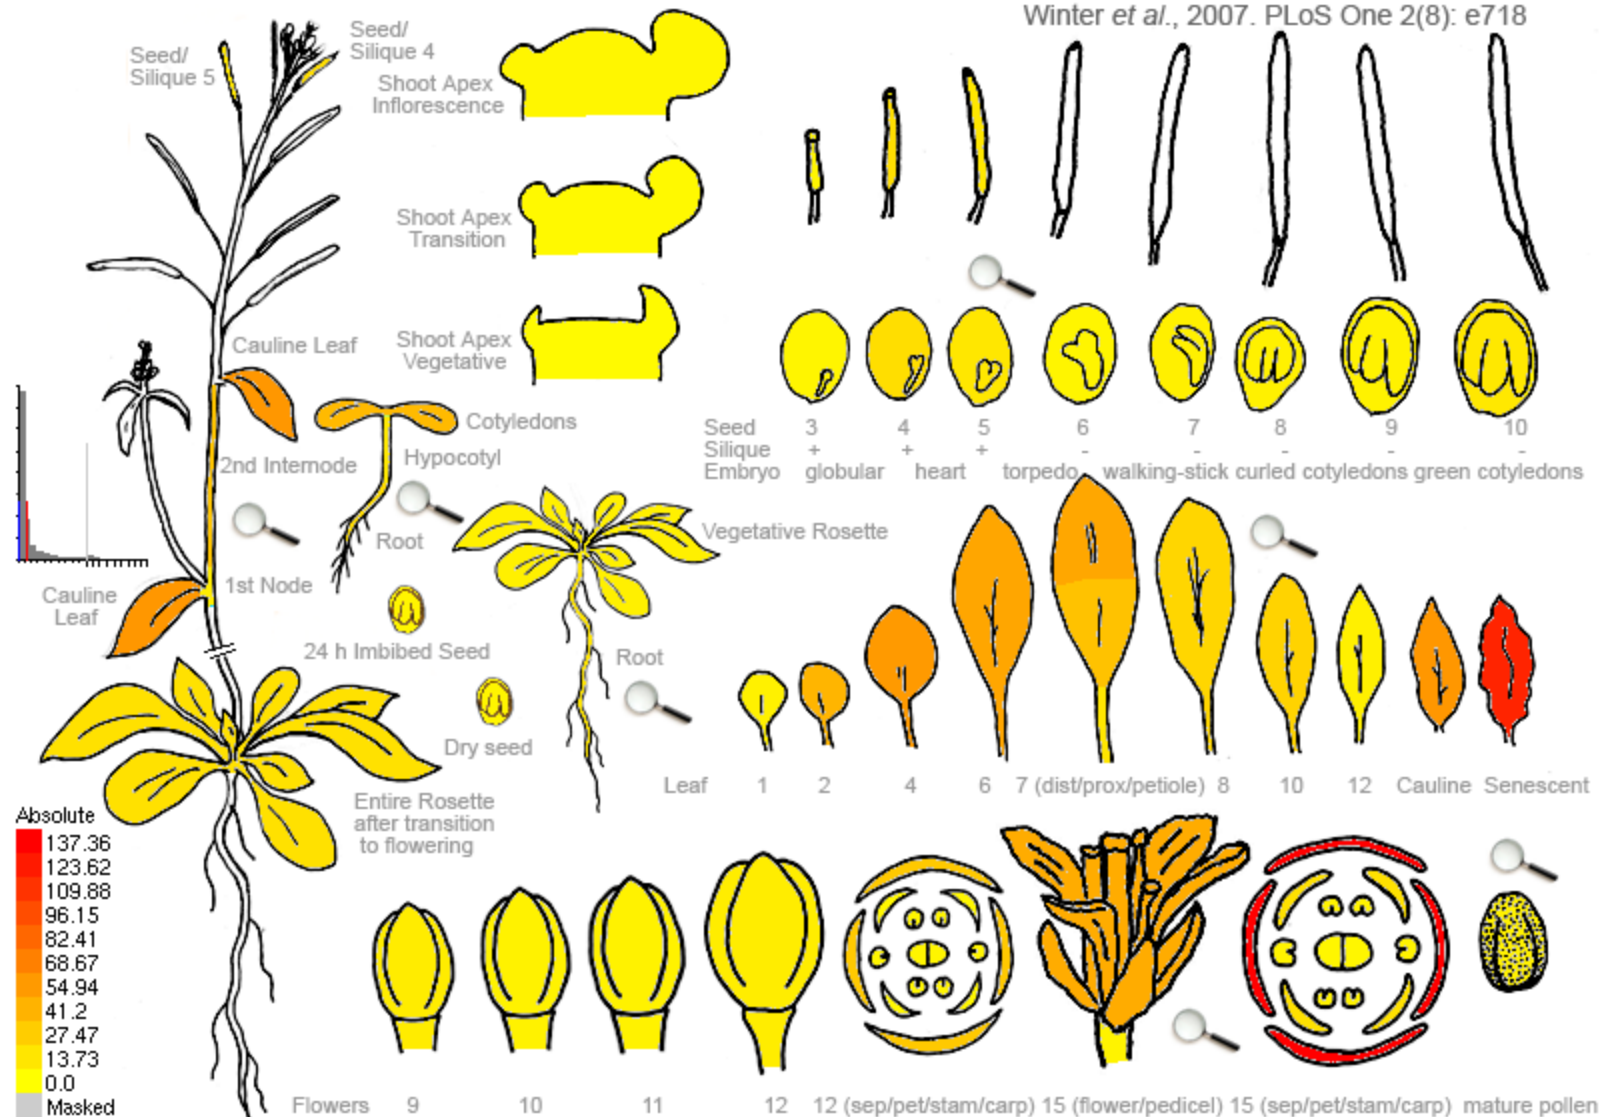

Fig P: Expression of NILR1 during development stages of plants.

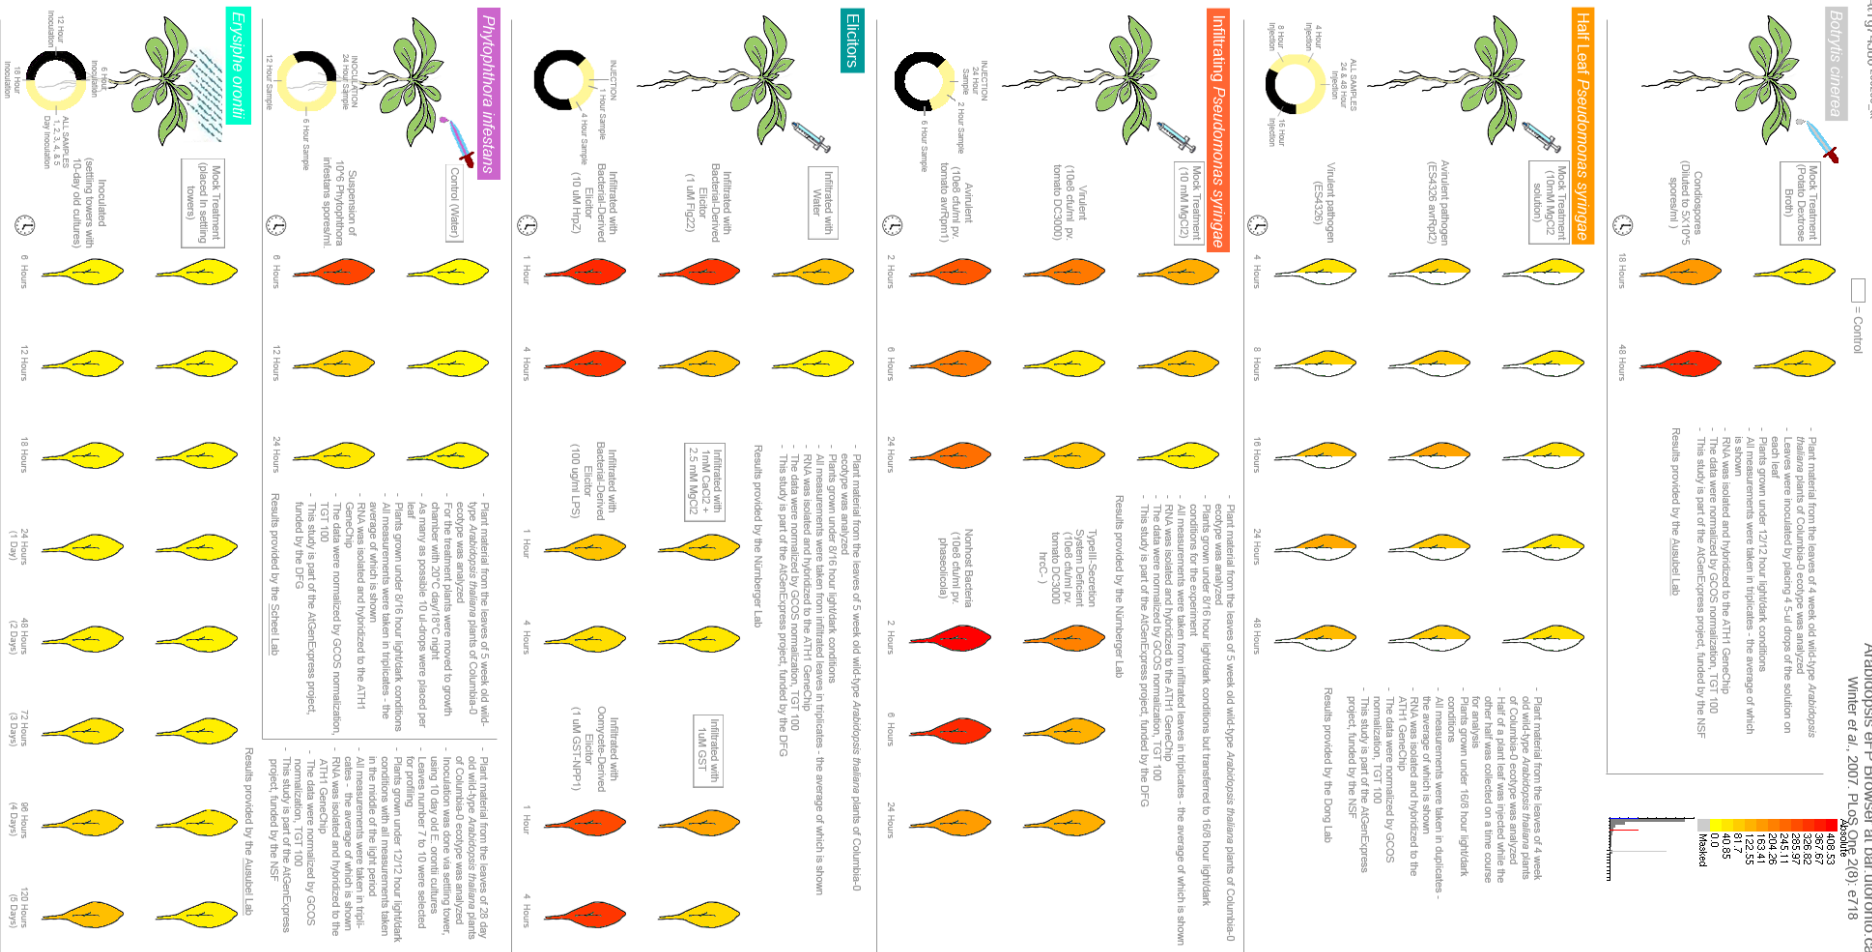

Fig Q: Expression of NILR1 under different biotic stress conditions.
