# Supplementary material for: Arabidopsis leucine-rich repeat receptor–like kinase NILR1 is required for induction of innate immunity to parasitic nematodes
Source: PLoS Pathog. 2017 Apr 13;13(4):e1006284. doi: 10.1371/journal.ppat.1006284 (PMC5391088; doi:10.1371/journal.ppat.1006284)
Supplement: S5 Data — (XLSX) [file ppat.1006284.s006.xlsx]

## Sheet: Sheet1
ATG locus	Biological function	Gene/Protein name	Migratory stage	NemaWater Treatment
			Fold Change
AT3G14840	LYSM RLK1-INTERACTING KINASE 1	LIK1	1.84557	1.77003
AT1G73080	ATPEPR1, PEP1 RECEPTOR 1, PEPR1	ATPEPR1, PEP1 RECEPTOR 1, PEPR1	2.56297	1.91312
AT5G65240	Unknown	Unknown	1.51489	1.62441
AT5G24430	Unknown	Unknown	1.66364	1.76929
AT3G08760		ATSIK	2.02407	3.2131
AT1G51620	Unknown	AT1G51620	2.09051	2.84904
AT1G53430	NILR1	AT1G53430	3.60329	5.36321
AT3G59700	HLECRK (lectin-receptor kinase)	HLECRK	1.98268	2.12408
AT3G57120	Unknown	Unknown	1.95466	2.02071
AT1G11050	Unknown	Unknown	1.60617	3.58345
AT2G02220	ATPSKR1, PHYTOSULFOKIN RECEPTOR 1, PSKR1	PSKR1	1.59145	2.08982
AT1G14370	APK2A, KIN1, KINASE 1, PBL2, PBS1-LIKE 2, PROTEIN KINASE 2A	APK2A (protein kinase 2A)	2.14116	2.17962
AT5G67080	mitogen-activated protein kinase kinase kinase 19	MAPKKK19	6.6551	1.71748
AT4G25390	Unknown	Unknown	1.84438	1.82898
AT5G06740	L-TYPE LECTIN RECEPTOR KINASE S.5, LECRK-S.5	LECRK-S.5	3.07905	2.34581
AT3G05360	ATRLP30, RECEPTOR LIKE PROTEIN 30, RLP30	ATRLP30	1.86951	2.17051
AT4G23270	(cysteine-rich RLK (RECEPTOR-like protein kinase) 19)	CRK19	1.85116	2.42031
AT5G25930	Unknown	Unknown	4.21266	6.04713
AT3G59740	L-TYPE LECTIN RECEPTOR KINASE V.7, LECRK-V.7	LECRK-V.7	3.14618	2.19855
AT1G11330	Unknown	Unknown	2.52065	1.75764
AT1G16670	Unknown	Unknown	2.34028	2.66175
AT5G02290		NAK	1.59556	2.15095
AT5G01950	Unknown	Unknown	1.76746	1.65991
AT1G61370	Unknown	Unknown	1.98427	2.56707
AT5G47070	Unknown	Unknown	1.97346	3.81499
AT4G21390	Arabidopsis thaliana B120	B120	3.20444	8.32089
AT4G18950	Unknown	Unknown	2.49633	1.6917
AT4G23180	CRK10, CYSTEINE-RICH RLK (RECEPTOR-LIKE PROTEIN KINASE) 10, RLK4	CRK10	2.61717	5.02649
AT4G28350	L-TYPE LECTIN RECEPTOR KINASE VII.2, LECRK-VII.2		3.66292	7.68678
AT1G09970	LRR XI-23, RECEPTOR-LIKE KINASE 7, RLK7	LRR XI-23	1.54938	1.59363
AT4G32300	S-receptor kinase -like protein	SD2-5 (S-domain-2 5)	2.18847	2.79322
AT2G05940	RIPK, RPM1-INDUCED PROTEIN KINASE	RIPK	1.8931	2.82437
AT3G09830	Unknown	Unknown	1.65788	2.81981
AT2G39660	BIK1, BOTRYTIS-INDUCED KINASE1	BIK1	1.92666	2.23898
AT1G74360	NILR2	Unknown	4.34301	4.12219
AT1G17750	ATPEPR2, PEP1 RECEPTOR 2, PEPR2	ATPEPR2	3.94579	3.34374
AT5G66210	CALCIUM-DEPENDENT PROTEIN KINASE 28,	CPK28	1.94592	2.7444
AT5G40170	ATRLP54, RECEPTOR LIKE PROTEIN 54, RLP54	RLP54 (receptor like protein 54)	3.11512	3.82111
AT1G70520	ALTERED SEED GERMINATION 6, ASG6, CRK2, CYSTEINE-RICH RLK (RECEPTOR-LIKE PROTEIN KINASE) 2	CRK2	1.60876	1.89996
AT1G61360	Unknown	Unknown	2.8163	3.52744
AT5G65600	L-TYPE LECTIN RECEPTOR KINASE IX.2, LECRK-IX.	LECRK-IX	9.10501	7.48904
AT1G66880	Putative Nematode Recognition Receptor 1	PNRR1	4.17766	4.31334
AT4G30340	ATDGK7, DGK7, DIACYLGLYCEROL KINASE 7	DGK7 (diacylglycerol kinase 7)	1.65187	1.72393
AT1G70130	L-TYPE LECTIN RECEPTOR KINASE V.2, LECRK-V.2	LECRK-V.2	2.95992	2.62641
AT1G53440	Unknown	Unknown	3.0855	2.53438
AT3G55950	ATCRR3, CCR3, CRINKLY4 RELATED 3	ATCRR3	3.25113	2.22536
AT3G59350	Unknown	Unknown	1.8554	2.04584
AT3G57750	HOPZ-ETI-DEFICIENT 1, ZED1	ZED1	1.55236	1.59785
AT1G06840	Unknown	Unknown	1.84131	1.78896
AT3G20860	NEK5 (NIMA-related kinase 5)	NEK5	1.88492	1.61039
AT1G56120	Unknown	Unknown	2.16177	2.75534
